# Supplementary material for: Electrochemical Reduction of Gaseous CO2 at Low-Intermediate Temperatures Using a Solid Acid Membrane Cell
Source: MDPI journal article supplement (doi:10.3390/catal12121504), 2022-11-24
Supplement: s1 [file s1]

# ***Supporting Information***

## **Electrochemical Reduction of Gaseous CO<sub>2</sub> at Low-Intermediate Temperatures using a Solid Acid Membrane Cell**

***Jae Young Kim,<sup>\*a</sup> Duck Hyun Youn<sup>\*b</sup>***

*<sup>a</sup>Korea Research Institute of Chemical Technology, 141 Gajeongro, Yuseong, Daejeon 34114, South Korea*

*<sup>b</sup>Department of Chemical Engineering, Department of Integrative Engineering for Hydrogen Safety, Kangwon National University, Chuncheon 24341, South Korea*

---

**Table S1.** Composition of the mixture to be deposited on the carbon paper to fabricate the Pt-based or Cu-based electrode for the membrane-electrode assembly (MEA) with CsH<sub>2</sub>PO<sub>4</sub>. Pt (<20 μm, Sigma-Aldrich, Product #: 205915) and Cu (14-25 μm, Sigma-Aldrich, Product #: 326453) were used as the electrocatalysts.

| <b>Pt-based</b>                                                                 | <b>Cu-based</b>                                                                 |
|---------------------------------------------------------------------------------|---------------------------------------------------------------------------------|
| Pt powder <20 μm (Aldrich)<br>0.4 mg/cm <sup>2</sup>                            | Cu powder 14–25 μm (Aldrich)<br>0.4 mg/cm <sup>2</sup>                          |
| +                                                                               | +                                                                               |
| CsH <sub>2</sub> PO <sub>4</sub> powder (synthesized)<br>1.2 mg/cm <sup>2</sup> | CsH <sub>2</sub> PO <sub>4</sub> powder (synthesized)<br>1.2 mg/cm <sup>2</sup> |
| +                                                                               | +                                                                               |
| 2-propanol 3 mL/cm <sup>2</sup>                                                 | 2-propanol 3 mL/cm <sup>2</sup>                                                 |

---

**Table S2.** Number of electrons to produce one molecule of each product via CO<sub>2</sub> reduction.

| CO <sub>2</sub> reduction products | # of electrons to produce one molecule of the product via CO <sub>2</sub> reduction                             |
|------------------------------------|-----------------------------------------------------------------------------------------------------------------|
| CO                                 | $\text{CO}_2 + 2\text{H}^+ + \underline{2}\text{e}^- \rightarrow \text{CO} + \text{H}_2\text{O}$                |
| CH <sub>4</sub>                    | $\text{CO}_2 + 8\text{H}^+ + \underline{8}\text{e}^- \rightarrow \text{CH}_4 + 2\text{H}_2\text{O}$             |
| C <sub>2</sub> H <sub>6</sub>      | $2\text{CO}_2 + 14\text{H}^+ + \underline{14}\text{e}^- \rightarrow \text{C}_2\text{H}_6 + 4\text{H}_2\text{O}$ |
| C <sub>2</sub> H <sub>4</sub>      | $2\text{CO}_2 + 12\text{H}^+ + \underline{12}\text{e}^- \rightarrow \text{C}_2\text{H}_4 + 4\text{H}_2\text{O}$ |
| C <sub>2</sub> H <sub>2</sub>      | $2\text{CO}_2 + 10\text{H}^+ + \underline{10}\text{e}^- \rightarrow \text{C}_2\text{H}_2 + 4\text{H}_2\text{O}$ |
| CH <sub>3</sub> OH                 | $\text{CO}_2 + 6\text{H}^+ + \underline{6}\text{e}^- \rightarrow \text{CH}_3\text{OH} + \text{H}_2\text{O}$     |
| HCOOH                              | $\text{CO}_2 + 2\text{H}^+ + \underline{2}\text{e}^- \rightarrow \text{HCOOH}$                                  |

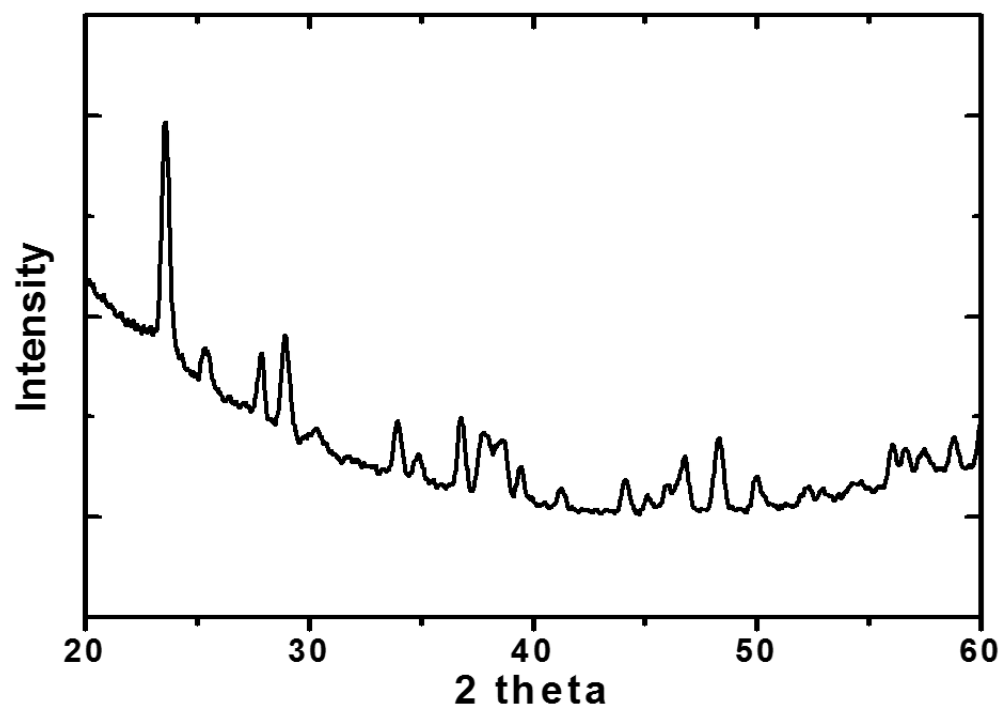

**Figure S1.** X-ray diffraction pattern of the synthesized  $\text{CsH}_2\text{PO}_4$ .

**Table S3.** Produced concentration [ $\mu\text{mol}/\text{cm}^2$ ] and Faradaic efficiency (F.E. [%]) of the products from the electrochemical reduction of gaseous  $\text{CO}_2$  with the Pt- $\text{CsH}_2\text{PO}_4$ -Cu MEA.

| [ $\mu\text{mol}$ ]<br>F.E. [%] | CO                  | CH <sub>4</sub>     | C <sub>2</sub> H <sub>6</sub> | C <sub>2</sub> H <sub>4</sub> | C <sub>2</sub> H <sub>2</sub> | CH <sub>3</sub> OH    | HCOOH                 |
|---------------------------------|---------------------|---------------------|-------------------------------|-------------------------------|-------------------------------|-----------------------|-----------------------|
| 0 min                           |                     | -                   | -                             | -                             | -                             | -                     | -                     |
| 10 min                          | 0.38<br><b>0.12</b> | 0.18<br><b>0.23</b> | 0.009<br><b>0.020</b>         | -                             | -                             | -                     | -                     |
| 40 min                          | 1.9<br><b>0.15</b>  | 0.81<br><b>0.26</b> | 0.027<br><b>0.015</b>         | -                             | -                             | 0.036<br><b>0.009</b> | 0.009<br><b>0.001</b> |
| 70 min                          | 2.6<br><b>0.12</b>  | 1.7<br><b>0.30</b>  | 0.054<br><b>0.017</b>         | -                             | -                             | 0.080<br><b>0.011</b> | 0.018<br><b>0.001</b> |
| 100 min                         | 3.0<br><b>0.10</b>  | 2.5<br><b>0.32</b>  | 0.089<br><b>0.020</b>         | 0.009<br><b>0.002</b>         | 0.009<br><b>0.001</b>         | 0.13<br><b>0.012</b>  | 0.027<br><b>0.001</b> |
| 130 min                         | 3.5<br><b>0.09</b>  | 3.3<br><b>0.32</b>  | 0.12<br><b>0.020</b>          | 0.018<br><b>0.003</b>         | 0.018<br><b>0.002</b>         | 0.16<br><b>0.012</b>  | 0.036<br><b>0.001</b> |

Initial gas composition in the cathode chamber: 5400  $\mu\text{mol}$   $\text{CO}_2$ , 2100  $\mu\text{mol}$   $\text{H}_2\text{O}$

Test conditions: Pt/ $\text{CsH}_2\text{PO}_4$ /Cu (surface area: 1  $\text{cm}^2$ )

-2 V,  $\text{H}_2/\text{CO}_2$  (0.4 atm  $\text{H}_2\text{O}$  both), 250°C

**Table S4.** Produced concentration [ $\mu\text{mol}/\text{cm}^2$ ] and Faradaic efficiency (F.E. [%]) of the products from the electrochemical reduction of gaseous  $\text{CO}_2$  with the Pt- $\text{CsH}_2\text{PO}_4$ -Pt MEA.

| $[\mu\text{mol}]$<br><i>F.E. [%]</i> | CO                  | CH <sub>4</sub>       | C <sub>2</sub> H <sub>6</sub> | C <sub>2</sub> H <sub>4</sub> | C <sub>2</sub> H <sub>2</sub> | CH <sub>3</sub> OH | HCOOH |
|--------------------------------------|---------------------|-----------------------|-------------------------------|-------------------------------|-------------------------------|--------------------|-------|
| 0 min                                |                     | -                     | -                             | -                             | -                             | -                  | -     |
| 10 min                               | 0.47<br><b>0.15</b> | 0.018<br><b>0.023</b> | -                             | -                             | -                             | -                  | -     |
| 40 min                               | 2.2<br><b>0.18</b>  | 0.089<br><b>0.028</b> | -                             | -                             | -                             | -                  | -     |
| 70 min                               | 3.9<br><b>0.18</b>  | 0.18<br><b>0.033</b>  | 0.009<br><b>0.003</b>         | -                             | -                             | -                  | -     |
| 100 min                              | 5.3<br><b>0.17</b>  | 0.31<br><b>0.040</b>  | 0.018<br><b>0.004</b>         | -                             | -                             | -                  | -     |
| 130 min                              | 6.3<br><b>0.15</b>  | 0.44<br><b>0.040</b>  | 0.018<br><b>0.003</b>         | -                             | -                             | -                  | -     |

Initial gas composition in the cathode chamber: 5400  $\mu\text{mol}$   $\text{CO}_2$ , 2100  $\mu\text{mol}$   $\text{H}_2\text{O}$

Test conditions: Pt/ $\text{CsH}_2\text{PO}_4$ /Pt (surface area: 1  $\text{cm}^2$ )

-2 V,  $\text{H}_2/\text{CO}_2$  (0.4 atm  $\text{H}_2\text{O}$  both), 250°C

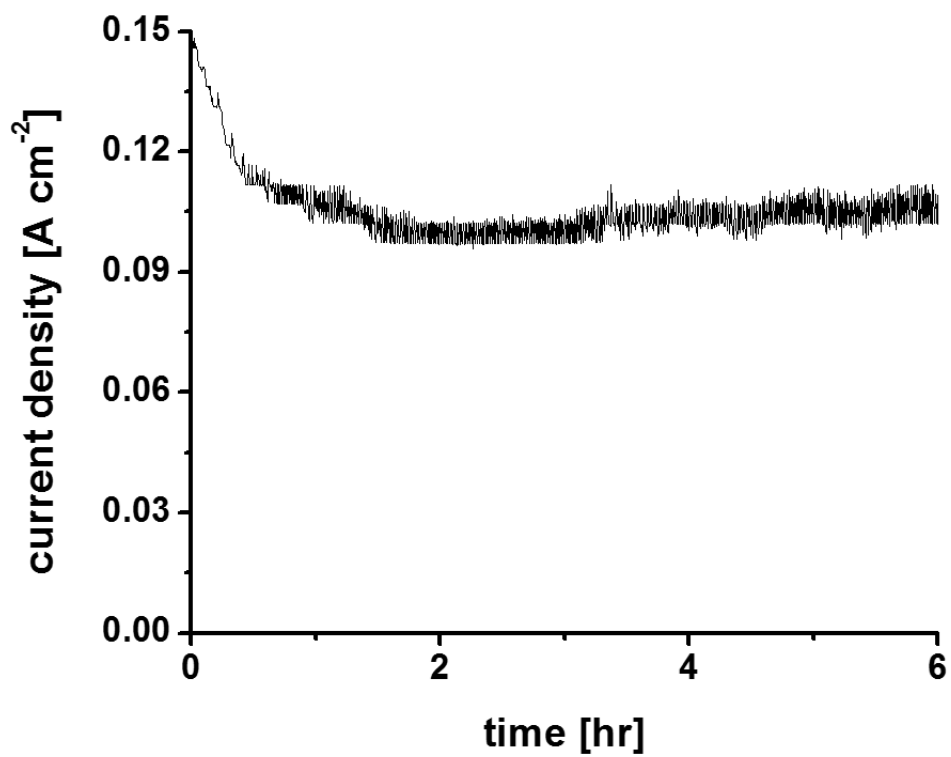

**Figure S2.** Current density-time curve for the Pt/CsH<sub>2</sub>PO<sub>4</sub>/Cu with -2 V constant cell voltage for the time duration during which CO<sub>2</sub> is being electrochemically reduced.
